# Supplementary material
Source: PubMed Central journal article supplement (PMC2525674)
Supplement: pbio.0060198.sg004.pdf [file pbio.0060198.sg004.pdf]

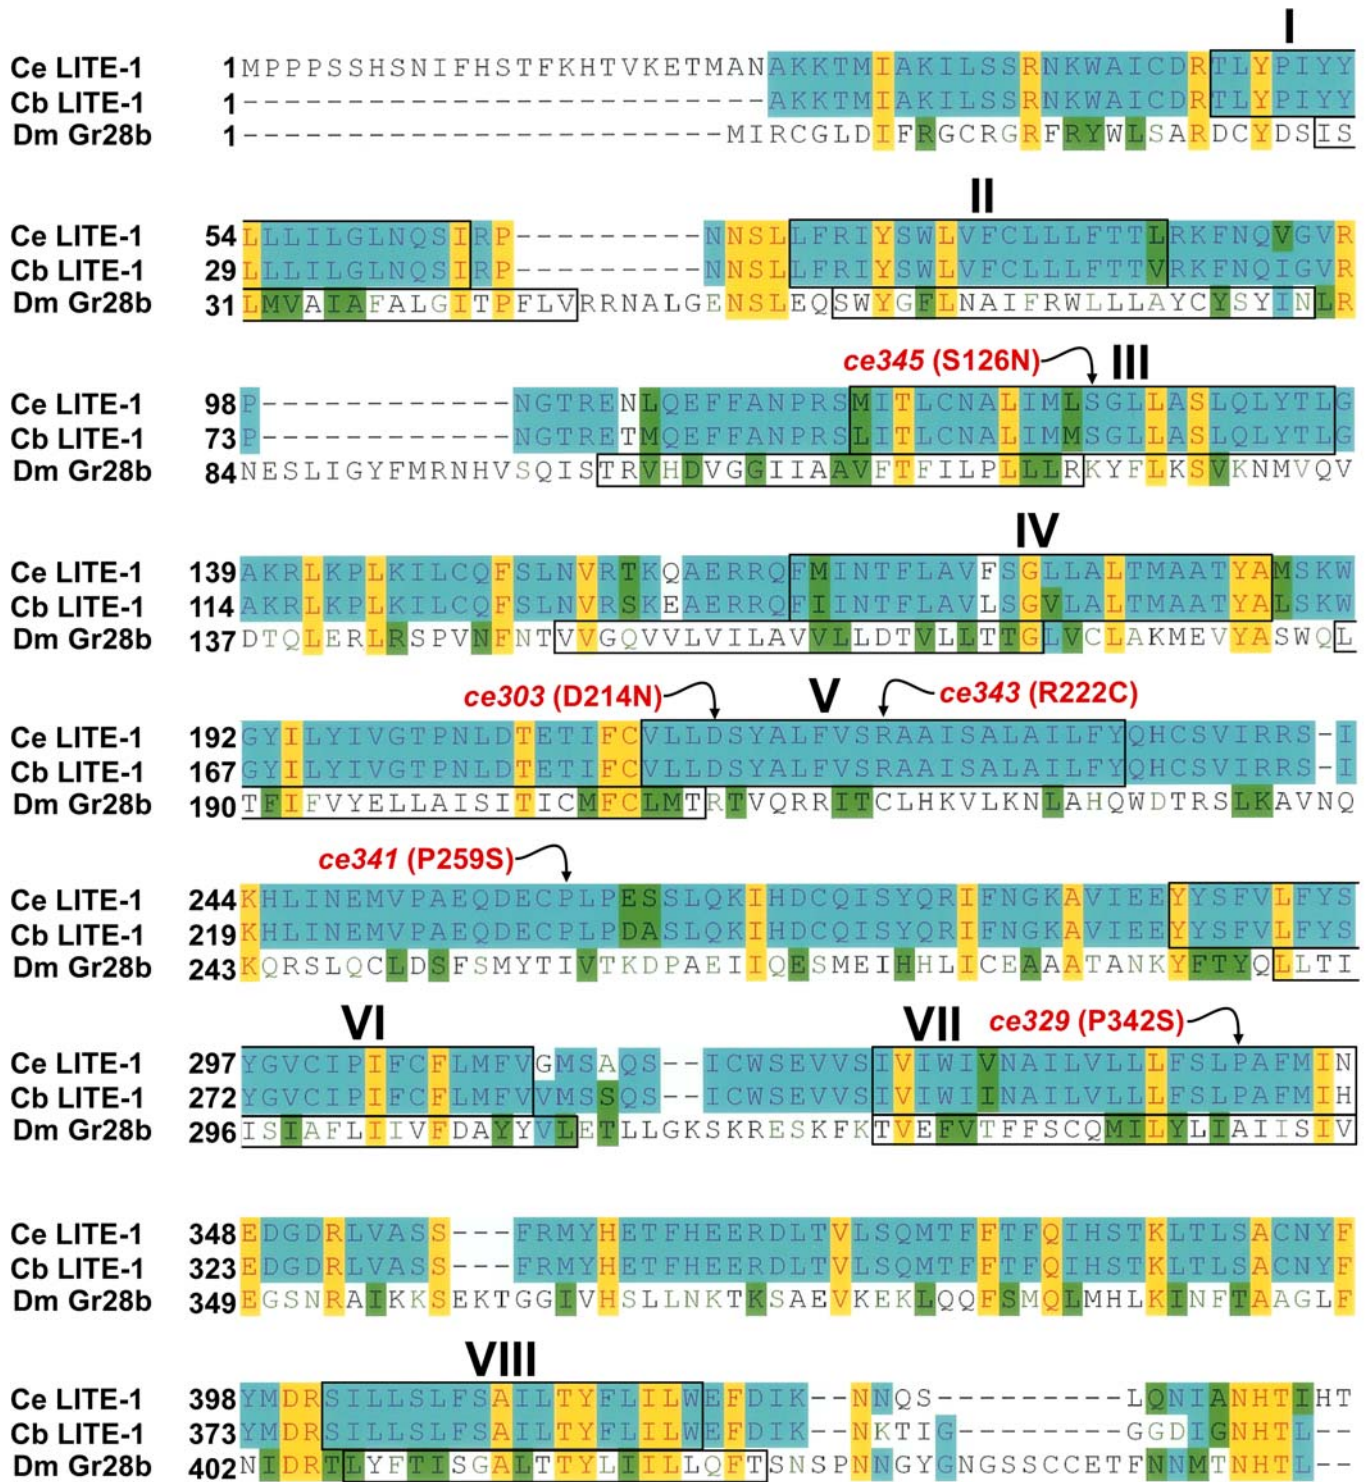

Figure S4. LITE-1 is a predicted eight – transmembrane protein with homology to *Drosophila* gustatory receptors.
