# Supplementary material
Source: PubMed Central journal article supplement (PMC2525674)
Supplement: pbio.0060198.sg005.pdf [file pbio.0060198.sg005.pdf]

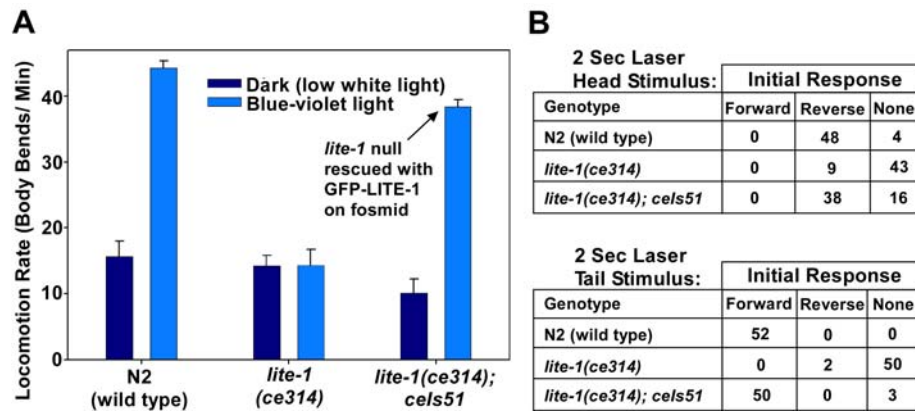

**Figure S5. Expression of GFP-LITE-1 from the *cels51* transgene is sufficient to restore light-responsiveness to a *lite-1* null mutant.**
