# Supplementary material
Source: PubMed Central journal article supplement (PMC2525674)
Supplement: pbio.0060198.sg007.pdf [file pbio.0060198.sg007.pdf]

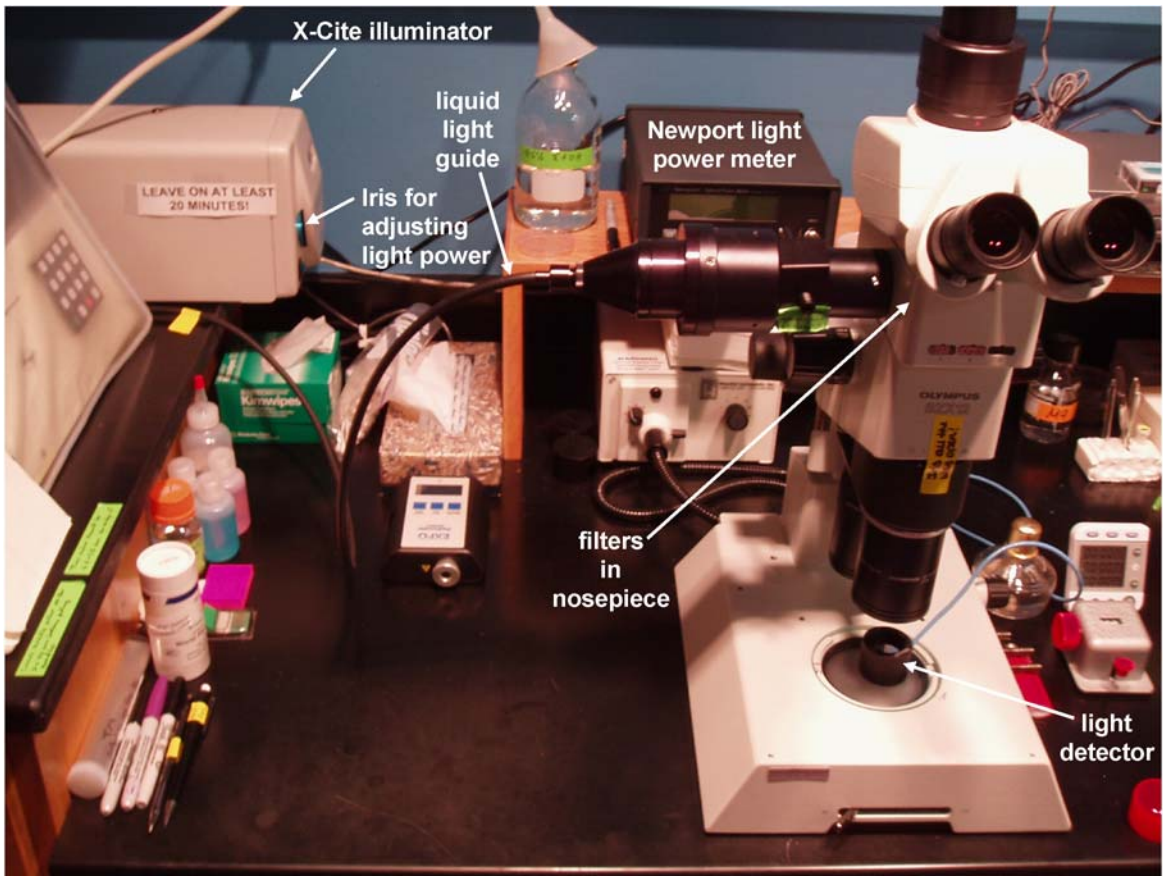

**Figure S7. Method for Measuring and Controlling Light Power through a Stereomicroscope Objective**
