# Supplementary material
Source: PubMed Central journal article supplement (PMC2525674)
Supplement: pbio.0060198.sg008.pdf [file pbio.0060198.sg008.pdf]

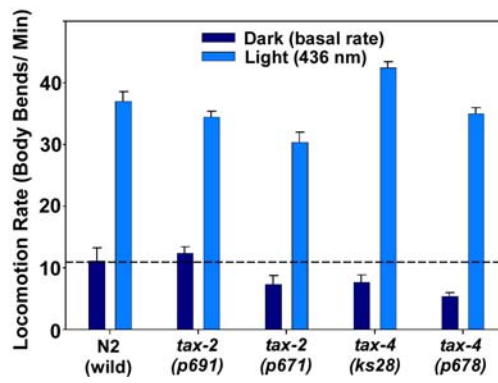

**Figure S8. Loss-of-function mutations in the TAX-2 and TAX-4 CNG channels do not affect the overall locomotion response to short wavelength light**
