# Supplementary material
Source: PubMed Central journal article supplement (PMC2525674)
Supplement: pbio.0060198.st002.pdf [file pbio.0060198.st002.pdf]

| <b>Supplementary Table 2. <i>lite-1</i> mutations</b>                                                                         |                                    |                            |                                                                                    |
|-------------------------------------------------------------------------------------------------------------------------------|------------------------------------|----------------------------|------------------------------------------------------------------------------------|
| Allele                                                                                                                        | Genomic sequence in N2 (wild type) | Genomic sequence in mutant | Effect on <i>lite-1</i> gene or protein                                            |
| <i>ce302</i>                                                                                                                  | TTG <b>GT</b> AGT                  | TTT <b>AT</b> AGT          | Splice donor site after end of 9 <sup>th</sup> exon                                |
| <i>ce303</i>                                                                                                                  | CTG <b>GAT</b> TC                  | CTG <b>AAT</b> TC          | D214N                                                                              |
| <i>ce304</i>                                                                                                                  | CTC <b>TGG</b> GA                  | CTC <b>TGA</b> GA          | W419 Stop                                                                          |
| <i>ce314</i>                                                                                                                  | GCG <b>GT</b> ATT                  | GCG <b>AT</b> ATT          | Splice donor site after end of 6 <sup>th</sup> exon                                |
| <i>ce318</i>                                                                                                                  | CTT <b>CAG</b> GA                  | CTT <b>TAG</b> GA          | Q106 Stop                                                                          |
| <i>ce319</i>                                                                                                                  | TCT <b>CAA</b> AT                  | TCT <b>TAA</b> AT          | Q376 Stop                                                                          |
| <i>ce320</i>                                                                                                                  | TCC <b>AG</b> GGA                  | TCC <b>AA</b> GGA          | Splice acceptor site before start of 9 <sup>th</sup> exon                          |
| <i>ce327</i>                                                                                                                  | TCC <b>AG</b> TGT                  | TCC <b>AA</b> TGT          | Splice acceptor site before start of 6 <sup>th</sup> exon                          |
| <i>ce329</i>                                                                                                                  | TTA <b>CCA</b> GC                  | TTA <b>TCA</b> GC          | P342S                                                                              |
| <i>ce338</i>                                                                                                                  | CTT <b>TTG</b> GC                  | CTT <b>TTI</b> GGC         | Insertion of T in 178 <sup>th</sup> codon causing frameshift                       |
| <i>ce340</i>                                                                                                                  | TAT <b>CAA</b> AG                  | TAT <b>TAA</b> AG          | Q276 Stop                                                                          |
| <i>ce341</i>                                                                                                                  | TGC <b>CCG</b> CT                  | TGC <b>TCG</b> CT          | P259S                                                                              |
| <i>ce342</i>                                                                                                                  | AAT <b>CAA</b> TC                  | AAT <b>TAA</b> TC          | Q62 Stop                                                                           |
| <i>ce343</i>                                                                                                                  | TCC <b>CGT</b> GC                  | TCC <b>TGT</b> GC          | R222C                                                                              |
| <i>ce345</i>                                                                                                                  | TTG <b>AG</b> GTG                  | TTG <b>AA</b> GTG          | S126N (mutation is in last base of exon; cDNA change is <b>AGC</b> to <b>AAC</b> ) |
| <i>ce312</i> , <i>ce316</i> , and <i>ce331</i> , isolated from separate mutageneses, have the same mutation as <i>ce302</i> . |                                    |                            |                                                                                    |
