# Supplementary material
Source: PubMed Central journal article supplement (PMC2525674)

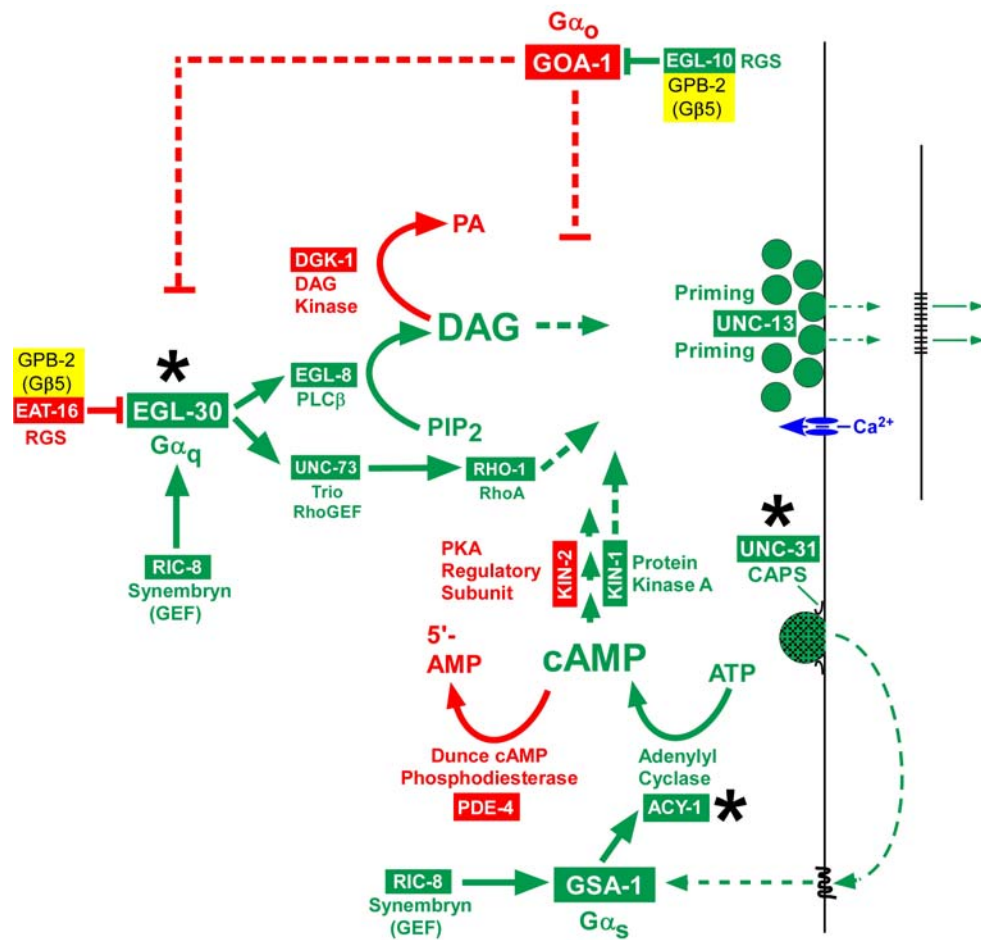

Figure S1. The Synaptic Signaling Pathways that Drive Locomotion in *C. elegans*

Supplement: pbio.0060198.sg001.pdf [file pbio.0060198.sg001.pdf]

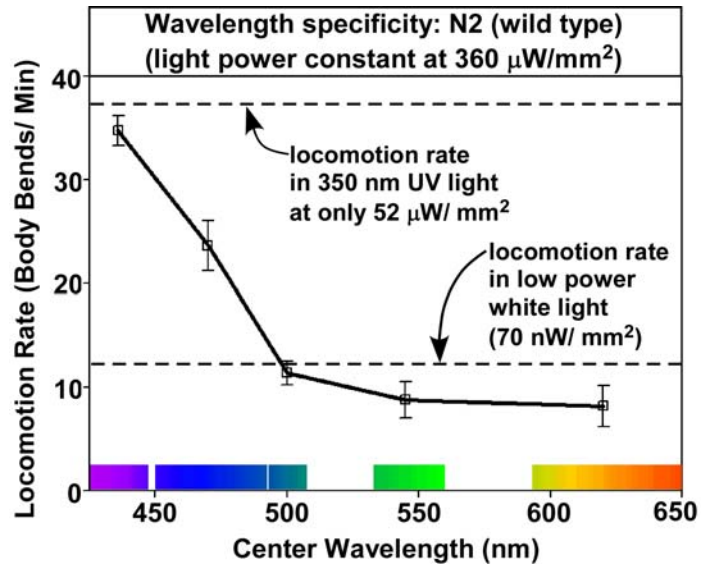

Figure S2. The Wild Type Response to Light is Restricted to Short Wavelengths

Supplement: pbio.0060198.sg002.pdf [file pbio.0060198.sg002.pdf]

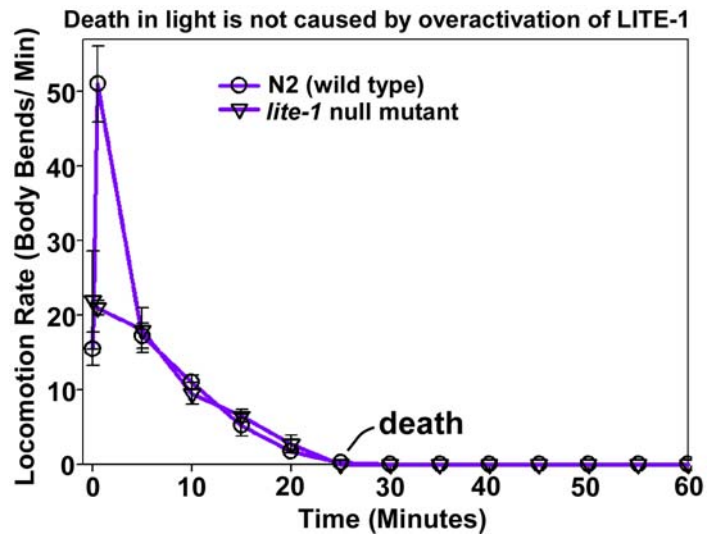

Figure S3. Death in Blue Light is Not Caused by Overactivation of LITE-1

Supplement: pbio.0060198.sg003.pdf [file pbio.0060198.sg003.pdf]

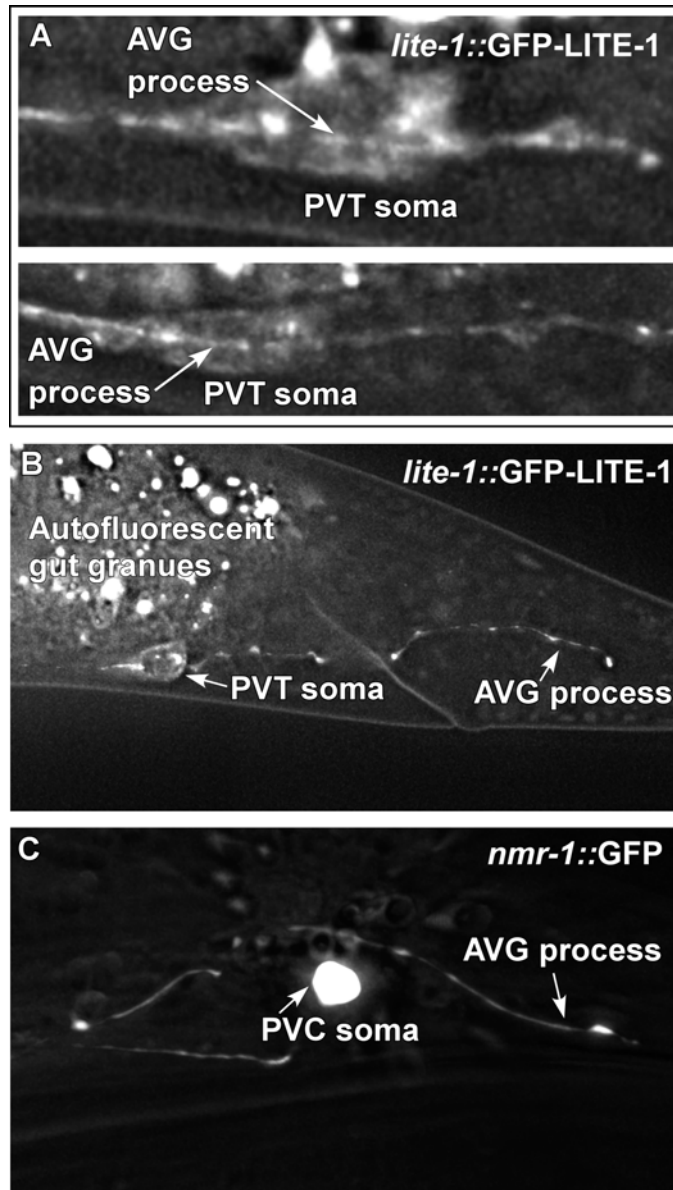

Figure S6. The tail process in the GFP-marked rescuing transgene is the AVG process.

Supplement: pbio.0060198.sg006.pdf [file pbio.0060198.sg006.pdf]
